# Supplementary material
Source: publisher figshare collection journal article supplement (https://acs.figshare.com/ndownloader/files/11132798)
Supplement: Supplementary file 1 [file 11132798]

## Supporting information

# Antiadhesion Function between a Biological Surface and a Metallic Device Interface at High Temperature by Wettability Control

*Jun-Yong Park<sup>1</sup>, Mizuki Tenjimbayashi<sup>1</sup>, Jun Muto<sup>2</sup>, Seimei Shiratori<sup>1</sup>, \**

1. Center for Material Design Science, School of Integrated Design Engineering, Keio University, 3-14-1 Hiyoshi, Yokohama, 223-8522, Japan.
2. Department of Neurosurgical Surgery, School of Medicine, Keio University, 35 Shinanomachi, Shinjuku-ku, Tokyo 160-8582, Japan.

Corresponding Author: shiratori@appi.keio.ac.jp

The temperature measurements on coated bipolar forceps and without coated bipolar forceps

The temperature curves of bipolar forceps making contact with different areas of the samples (coated bipolar forceps and without coated one) are shown here: pig liver, chicken wing blood tube, chicken wing under skin, chicken wing muscle, chicken wing skin. Based on these temperature curves Figure 4 in the manuscript was obtained.

(a) Pig liver

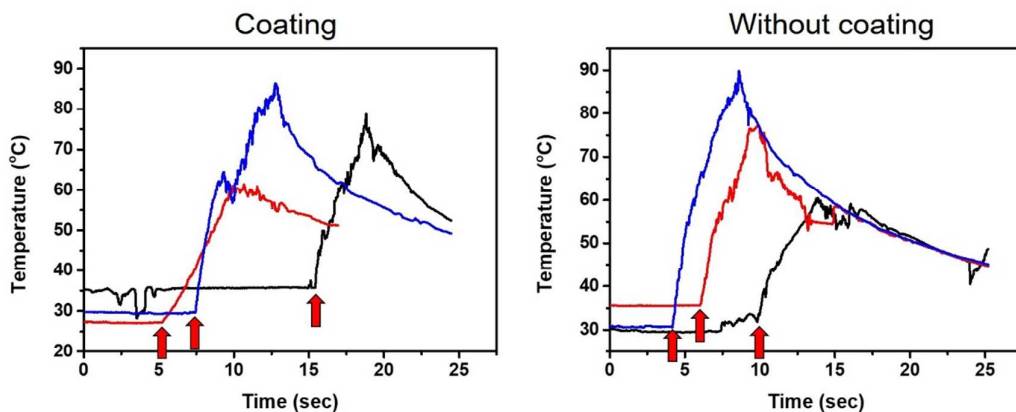

(b) chicken wing blood tube

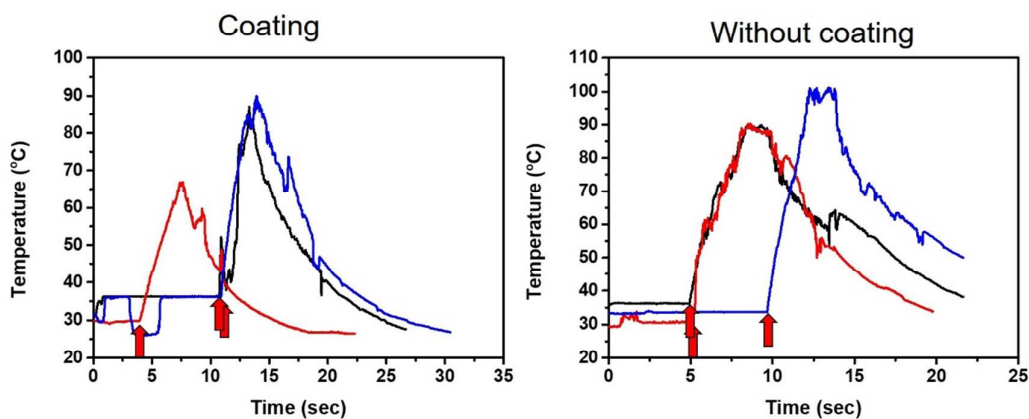

(c) chicken wing under skin

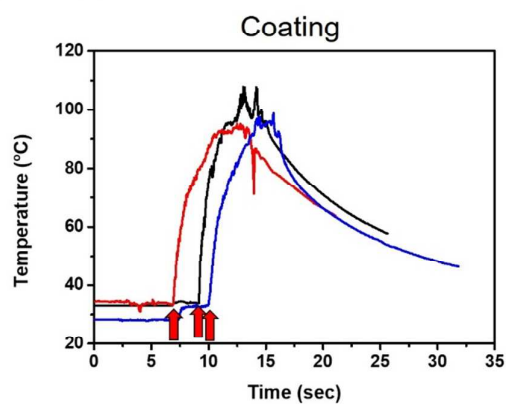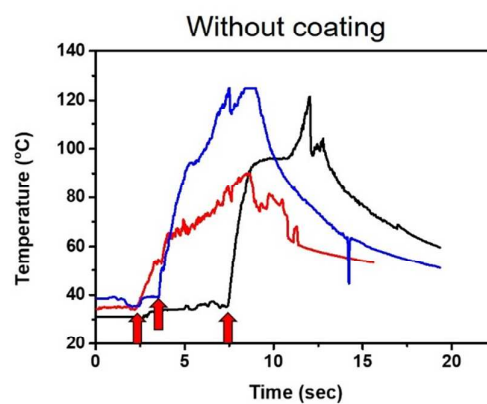

(d) chicken wing muscle

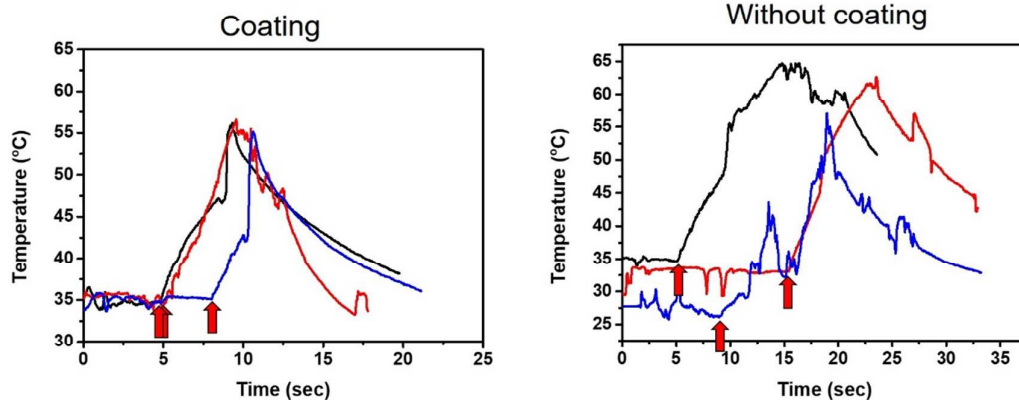

(e) chicken wing skin

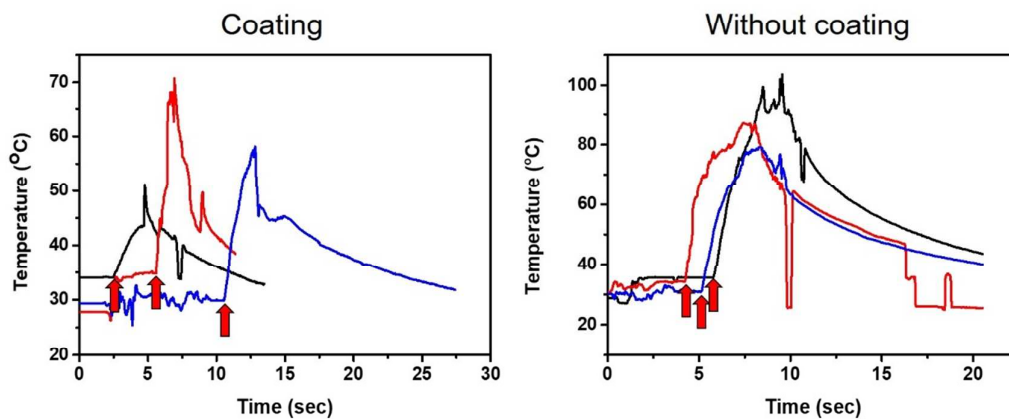

**Figure S1.** The temperature curve of bipolar forceps making contact with different areas of the samples. (a) Pig liver, (b) chicken wing blood tube, (c) chicken wing under the skin, (d) chicken wing muscle, (e) chicken wing skin. Red arrow indicates initial start point of applied voltage.
